# Supplementary material for: Digitale Gesundheitsanwendungen (DiGA) in der Primärversorgung – Erfahrungen und Beobachtungen von Hausärzt*innen hinsichtlich der Anwendung von DiGA
Source: Springer Nature journal article supplement (doi:10.1007/s11553-022-00988-4), 2022-10-25
Supplement: MOESM1 [file 23639306]

## **Interviewleitfaden**

### ***I) Einführung***

Seit 2020 gibt es für Ärzt\*innen die Möglichkeit, Patient\*innen digitale Gesundheitsanwendungen, kurz: DiGA, auf Rezept zu verordnen. Als verschreibungsfähige mobile Apps sollen DiGA dabei helfen, Erkrankungen besser zu erkennen und zu behandeln oder die Gesundheitsvorsorge unterstützen. Im Gegensatz zu gewöhnlichen Gesundheits-Apps, die man ohne Rezept bekommt, gelten DiGA als Medizinprodukte. DiGA werden in einem Verfahren des Bundesinstituts für Arzneimittel und Medizinprodukte (BfArM) eingehend geprüft und bei positivem Ergebnis in ein Verzeichnis erstattungsfähiger Programme aufgenommen. Dies bedeutet, dass DiGA-Hersteller einen Antrag auf Zulassung stellen müssen und als Voraussetzung für eine Aufnahme in das DiGA-Verzeichnis eine Reihe von Kriterien erfüllt sein müssen, darunter Standards zu Datenschutz und Informationssicherheit, Qualität medizinischer Inhalte, Nutzerfreundlichkeit und Robustheit der Anwendung sowie Patient\*innensicherheit. Nutzen und Mehrwert der Anwendung (Versorgungseffekt) müssen ausreichend belegt werden.

Sie haben in unserem Vorgespräch angegeben, dass Sie DiGA bereits eingesetzt bzw. Patient\*innen verschrieben haben. Hierzu möchten wir Ihnen im Folgenden einige Fragen zu Ihren bisherigen Erfahrungen stellen.

### ***II) Verbreitung der Nutzung von mHealth unter Patient\*innen***

Was schätzen Sie: Wie viel Prozent Ihrer Patient\*innen nutzen Gesundheits-Apps und/oder andere digitale Tools zur gesundheitlichen Vorsorge bzw. zum Krankheitsmanagement? Um welche Patient\*innengruppen handelt es sich?

Wenn Sie das Gesamtpotenzial von Patient\*innen betrachten, die Ihrer Meinung nach grundsätzlich interessiert und bereit wären, mHealth-Tools wie Gesundheits-Apps, DiGA oder ähnliche Programme zur Vorsorge oder Krankheitsbewältigung zu nutzen: Wie viel Prozent Ihrer Patientenschaft wären dies Ihrer Einschätzung nach?

Inwiefern lässt sich dieses Potenzial mithilfe von DiGA ausschöpfen?

### ***III) Kenntnisnahme von und Einstellungen in Bezug auf DiGA***

Wann und wie haben Sie ursprünglich davon erfahren, dass es solche verschreibungsfähigen medizinischen Gesundheits-Apps gibt?

- Leitfaden: Hausärztliche Erfahrungen mit digitalen Gesundheitsanwendungen (DiGA) -

Waren Sie ursprünglich, als Sie von DiGA erfuhren, eher positiv oder skeptisch in Bezug auf solche Programme eingestellt? Warum? Was hat Ihre Meinung ggf. geändert?

Wie eingangs angesprochen, werden DiGA in einem systematischen Verfahren des Bundesinstituts für Arzneimittel und Medizinprodukte (BfArM) eingehend geprüft. Inwiefern gehen Sie davon aus, dass solche vom BfArM geprüften digitale Gesundheitsanwendungen grundsätzlich verlässliche Programme sind, die man als Ärzt\*in ggf. Patient\*innen bedenkenlos empfehlen und verschreiben kann?

Inwiefern gehen Sie davon aus, dass es bei der Verschreibung von DiGA und deren Nutzung im Praxiskontext ausreichend Rechtssicherheit für Ärzt\*innen gibt (mit Blick auf Fragen von Risiken und Haftungsfragen)?

Wie schätzen Sie das ein: Wie groß ist der Beitrag, den DiGA Ihrer Meinung bzw. Erfahrung nach zur Gesundheitsvorsorge und/oder Genesung von Patient\*innen – die richtige Anwendung vorausgesetzt – leisten können?

Inwieweit ist der Beitrag, den DiGA zur Gesundheitsvorsorge und/oder Genesung von Patient\*innen leisten können, größer als jener gewöhnlicher, kostenfreier Gesundheits-Apps?

In welchen Anwendungsbereichen sind DiGA Ihrer Ansicht nach (besonders) sinnvoll und können eine positive Wirkung bei Patient\*innen entfalten?

Worin bestehen Ihrer Auffassung nach die wichtigsten Vorteile einer DiGA-Nutzung im Praxiskontext? Worin bestehen Nachteile oder Risiken?

Im Folgenden möchte ich Ihnen einige Aussagen vorlesen, und Sie sagen mir bitte jeweils, inwiefern Sie der jeweiligen Aussage zustimmen. Bitte versuchen Sie Ihre Position möglichst zu begründen.

- *„Die Anwendung von DiGA ist für viele Patient\*innen zu kompliziert, wodurch fehlerhafte Gesundheitsdaten gesammelt werden oder im Extremfall Therapien fehlschlagen“*
- *„DiGA stärken die Compliance von Patient\*innen, z.B. bei Krankheitsmanagement oder Prävention“*
- *„Durch DiGA lassen sich Arztkontakte zeitlich effektiver gestalten“*
- *„Krankheiten und Krankheitsrisiken können aufgrund der Nutzung von DiGA schneller erkannt bzw. diagnostiziert werden“*
- *„Mit DiGA lassen sich neue Patient\*innengruppen erreichen“*

#### ***IV) Verschreibungspraxis und Erfahrungen mit Einsatz in der Versorgung***

Wie sind Sie ursprünglich auf DiGA ‚gekommen‘, ich meine, dass Sie entschieden haben, diese in der Patient\*innenversorgung einzusetzen? Was hat der eigenen Auffassung nach dazu geführt, dass Sie DiGA „ausprobiert“ haben?

Haben Sie, bevor DiGA eingeführt wurden, Patient\*innen bereits die Anwendung von Gesundheits-Apps nahe gelegt? Inwiefern hat sich diese Empfehlungspraxis gesteigert, seit es DiGA gibt? Haben Sie durch DiGA mehr Vertrauen und Sicherheit gewonnen?

Wie häufig ist es bereits vorgekommen, dass Sie im Gespräch mit Patient\*innen die Möglichkeit einer Unterstützung durch DiGA zur Unterstützung der Vorsorge oder Krankheitsbewältigung von sich aus angesprochen haben?

Wie häufig ist es bereits vorgekommen, dass Sie Patient\*innen die Nutzung von bestimmten DiGA zur Prävention und/oder Therapie empfohlen und daraufhin konkret verordnet haben?

In welchen Anwendungsbereichen und Kontexten ist die DiGA-Verordnung hauptsächlich erfolgt (z.B. Prävention, Lebensstiländerung, Krankheitsmanagement)?

Inwiefern nutzen Sie DiGA konkret zur Therapieplanung, also dass Sie sich z.B. auf mittels Gesundheits-App erfasste Daten verlassen und diese in die Therapie einfließen lassen?

Falls Sie dies noch wissen: Gibt es bestimmte DiGA, die Sie Patient\*innen vor allem verschrieben haben?

Welche Patient\*innengruppen sind Ihrer Auffassung nach besonders empfänglich für DiGA, welche eher nicht?

Was muss eine DiGA Ihrer Ansicht nach erfüllen, damit Sie diese Patient\*innen empfehlen bzw. verordnen? Was ist Ihnen dabei besonders wichtig? Bitte nennen Sie 1-5 Kriterien.

Wenn Sie die Anwendungsbereiche betrachten, in denen Sie DiGA eingesetzt haben: Wie beurteilen Sie den Nutzen? Wo war der Nutzen am größten?

Welche Effekte für den Gesundheitszustand haben Sie bereits als Ergebnis einer DiGA-Nutzung bei Patient\*innen beobachtet? Inwiefern kam es ggf. auch zu negativen Effekten?

***V) Informationsverhalten und persönliche Kompetenzeinschätzung***

Wie häufig kommt es vor, dass Sie sich über DiGA, Gesundheits-Apps und/oder andere digitale Tools informieren?

Über welche Quellen (z.B. Internetseiten) informieren Sie sich schon mal darüber?

Wie schätzen Sie Ihr Wissen bzw. Ihre Kompetenz ein, wenn es darum geht, das Angebot an verfügbaren DiGA zu überblicken?

Wie schätzen Sie Ihr Wissen bzw. Ihre Kompetenz ein, wenn es darum geht, Patient\*innen zu DiGA zu beraten?

***VI) Bilanzierung, weitere Entwicklung und Durchsetzung von DiGA***

Wenn Sie Ihre bisherige Erfahrung mit DiGA nehmen: Was sollte weiter rund um DiGA verbessert werden, was würden Sie sich vor allem wünschen?

Einmal angenommen, die von Ihnen angegebenen Punkte würden umgesetzt: Wären Sie unter diesen Voraussetzungen bereit, DiGA in der Patientenversorgung stärker als bislang zu berücksichtigen?

Inwiefern gehen Sie davon aus, dass DiGA die Digitalisierung von Gesundheitswesen und Arztpraxen mittel- und längerfristig in positiver und sinnvoller Weise voranbringen werden? Inwieweit ist dies ein realistischer Anspruch?

Es gibt Hinweise darauf dass viele niedergelassene Ärzt\*innen und gerade Hausärzt\*innen DiGA noch bislang zurückhaltend begegnen, diese also noch nicht verordnen. Worin liegen Ihrer Auffassung nach die Gründe hierfür?

Wie ließe sich dies ggf. ändern?
